# Supplementary material for: Renewing Lost Genetic Variability with a Classical Yeast Genetics Approach
Source: MDPI journal article supplement (doi:10.3390/jof9020264), 2023-02-16
Supplement: s1 [file s1]

**Table S1:** Probability associated with the Student's *t*-Test (*p*-value) of all monosporal colonies compared to the parental strain (YVGC13A).

| MSCs         | lag   | t_max | max_slope |
|--------------|-------|-------|-----------|
| YV_1         | 0.000 | 0.017 | 0.174     |
| YV_2         | 0.002 | 0.008 | 0.054     |
| YV_3         | 0.018 | 0.041 | 0.047     |
| <b>YV_10</b> | 0.047 | 0.275 | 0.005     |
| <b>YV_17</b> | 0.005 | 0.017 | 0.431     |
| <b>YV_19</b> | 0.003 | 0.002 | 0.084     |
| YV_25        | 0.005 | 0.041 | 0.002     |
| YV_28        | 0.008 | 0.006 | 0.486     |
| <b>YV_29</b> | 0.012 | 0.035 | 0.309     |
| YV_35        | 0.032 | 0.097 | 0.217     |
| YV_36        | 0.019 | 0.074 | 0.087     |
| <b>YV_37</b> | 0.048 | 0.107 | 0.357     |
| YV_47        | 0.003 | 0.017 | 0.340     |
| YV_48        | 0.019 | 0.067 | 0.175     |
| <b>YV_49</b> | 0.029 | 0.005 | 0.261     |
| <b>YV_55</b> | 0.032 | 0.017 | 0.254     |
| YV_56        | 0.032 | 0.222 | 0.026     |
| <b>YV_57</b> | 0.019 | 0.333 | 0.041     |
| YV_63        | 0.019 | 0.330 | 0.062     |
| <b>YV_64</b> | 0.001 | 0.013 | 0.090     |
| <b>YV_65</b> | 0.005 | 0.001 | 0.124     |
| <b>YV_72</b> | 0.019 | 0.191 | 0.041     |
| YV_73        | 0.059 | 0.064 | 0.439     |
| YV_74        | 0.010 | 0.104 | 0.203     |
| YV_82        | 0.002 | 0.006 | 0.398     |
| YV_83        | 0.007 | 0.024 | 0.022     |
| YV_84        | 0.000 | 0.005 | 0.107     |
| YV_93        | 0.010 | 0.005 | 0.009     |
| <b>YV_94</b> | 0.000 | 0.029 | 0.012     |
| YV_95        | 0.004 | 0.037 | 0.005     |

**Legend:** Student's *t*-test was performed to compare growth parameters (lag, t\_max, max\_slope) of MSCs with the parental strain. The monosporal colonies selected for further analysis are highlighted in bold.

**Table S2:** Probability associated with the Student's *t*-Test (*p*-value) of all monosporal colonies compared to the parental strain (TC1517).

| MSCs         | lag   | t_max | max_slope |
|--------------|-------|-------|-----------|
| TC_1         | 0.500 | 0.104 | 0.262     |
| TC_2         | 0.047 | 0.035 | 0.435     |
| TC_3         | 0.036 | 0.000 | 0.410     |
| TC_7         | 0.371 | 0.037 | 0.288     |
| TC_8         | 0.018 | 0.003 | 0.371     |
| <b>TC_9</b>  | 0.065 | 0.017 | 0.201     |
| TC_12        | 0.092 | 0.009 | 0.146     |
| TC_13        | 0.019 | 0.001 | 0.317     |
| <b>TC_14</b> | 0.019 | 0.004 | 0.028     |
| TC_17        | 0.010 | 0.004 | 0.244     |
| TC_19        | 0.004 | 0.004 | 0.137     |
| TC_20        | 0.000 | 0.001 | 0.303     |
| TC_21        | 0.005 | 0.001 | 0.496     |
| <b>TC_22</b> | 0.017 | 0.003 | 0.456     |
| <b>TC_23</b> | 0.018 | 0.001 | 0.293     |
| <b>TC_25</b> | 0.004 | 0.001 | 0.076     |
| TC_29        | 0.059 | 0.018 | 0.057     |
| TC_30        | 0.092 | 0.007 | 0.221     |
| TC_31        | 0.027 | 0.007 | 0.029     |
| <b>TC_33</b> | 0.003 | 0.000 | 0.053     |
| TC_37        | 0.008 | 0.001 | 0.221     |
| TC_38        | 0.007 | 0.000 | 0.075     |
| TC_39        | 0.004 | 0.001 | 0.251     |
| TC_41        | 0.016 | 0.006 | 0.122     |
| <b>TC_42</b> | 0.019 | 0.002 | 0.165     |
| <b>TC_44</b> | 0.010 | 0.002 | 0.134     |
| <b>TC_48</b> | 0.011 | 0.004 | 0.094     |
| <b>TC_49</b> | 0.003 | 0.001 | 0.049     |
| <b>TC_52</b> | 0.002 | 0.002 | 0.095     |
| <b>TC_55</b> | 0.010 | 0.003 | 0.100     |

**Legend:** Student's *t*-test was performed to compare growth parameters (lag, t\_max, max\_slope) of MSCs with the parental strain. The monosporal colonies selected for further analysis are highlighted in bold.

**Table S3:** Probability associated with the Student's *t*-Test (*p*-value) of all monosporal colonies compared to the parental strain (YI30).

| MSCs         | lag   | t_max | max_slope |
|--------------|-------|-------|-----------|
| YI_9         | 0.018 | 0.047 | 0.031     |
| YI_10        | 0.000 | 0.003 | 0.090     |
| <b>YI_11</b> | 0.018 | 0.004 | 0.070     |
| <b>YI_16</b> | 0.019 | 0.019 | 0.384     |
| YI_18        | 0.029 | 0.005 | 0.206     |
| YI_19        | 0.018 | 0.004 | 0.057     |
| <b>YI_20</b> | 0.000 | 0.018 | 0.029     |
| <b>YI_22</b> | 0.008 | 0.000 | 0.070     |
| <b>YI_30</b> | 0.005 | 0.005 | 0.031     |
| <b>YI_35</b> | 0.010 | 0.003 | 0.098     |
| <b>YI_35</b> | 0.059 | 0.127 | 0.003     |
| <b>YI_39</b> | 0.000 | 0.264 | 0.002     |
| <b>YI_42</b> | 0.005 | 0.032 | 0.495     |
| <b>YI_44</b> | 0.037 | 0.019 | 0.147     |
| <b>YI_47</b> | 0.036 | 0.004 | 0.148     |
| <b>YI_53</b> | 0.018 | 0.018 | 0.059     |
| YI_55        | 0.029 | 0.008 | 0.049     |
| <b>YI_56</b> | 0.010 | 0.069 | 0.002     |
| YI_57        | 0.005 | 0.005 | 0.023     |
| YI_66        | 0.029 | 0.029 | 0.010     |
| YI_67        | 0.005 | 0.004 | 0.018     |
| YI_70        | 0.029 | 0.008 | 0.059     |
| YI_76        | 0.037 | 0.037 | 0.073     |
| YI_78        | 0.011 | 0.011 | 0.060     |
| YI_80        | 0.029 | 0.004 | 0.021     |
| YI_85        | 0.029 | 0.036 | 0.021     |
| YI_86        | 0.029 | 0.004 | 0.020     |
| YI_87        | 0.048 | 0.005 | 0.021     |
| YI_102       | 0.018 | 0.004 | 0.029     |
| YI_103       | 0.065 | 0.019 | 0.069     |

**Legend:** Student's *t*-test was performed to compare growth parameters (lag, t\_max, max\_slope) of MSCs with the parental strain. The monosporal colonies selected for further analysis are highlighted in bold.
